1 **Age-dependent changes in transcription factor FOXO targeting in *Drosophila melanogaster***

2 Allison Birnbaum<sup>1</sup>, Marc Tatar<sup>2</sup>, Hua Bai<sup>1\*</sup>

3

4 1 Department of Genetics, Development, and Cell Biology, Iowa State University, Ames, IA

5 50011, USA

6 2 Department of Ecology and Evolutionary Biology, Brown University, Providence, RI, 02912,

7 USA.

8

9 **Email:**

10 Allison Birnbaum: abirnb1@iastate.edu

11 Marc Tatar: Marc\_Tatar@brown.edu

12 Hua Bai: hbai@iastate.edu

13

14 **\*Corresponding Authors:**

15 Hua Bai

16

17

18

19

20

21

22

23

## 24 **Abstract**

25 FOXO transcription factors have long been associated with longevity and tissue  
26 homeostasis. Although direct targets of FOXO have been reported in various long-lived mutants  
27 or stress conditions (nutrient deprivation), no studies have investigated how normal aging  
28 impacts the transcriptional activity of FOXO. Here, we conducted chromatin  
29 immunoprecipitation sequencing in both young and old wild-type fruit flies, *Drosophila*  
30 *melanogaster*, to evaluate the dynamics of FOXO gene targeting during aging. *Drosophila*  
31 FOXO binds to 2617 genes at young ages, whereas the number of FOXO-bound genes  
32 dramatically decreases to 224 at old ages. Consistently, many genes bound by FOXO in young  
33 flies are transcriptionally altered with age, including genes in Hippo and MAPK signaling  
34 pathways. Interestingly, we also find that many FOXO-bound genes in wild-type flies are unique  
35 from those in insulin mutants, suggesting FOXO is regulated by multiple upstream inputs.  
36 Together, these results provide new insights into dynamic FOXO targeting under normal aging  
37 and highlight the diverse regulatory mechanisms for FOXO transcriptional activity that are  
38 currently less understood.

39 **Keywords:** Forkhead transcription factor FOXO, ChIP-Seq, Transcriptional regulation, Longevity  
40 control

41

## 42 **Introduction**

43 The process of aging is accompanied by a decline in physiological function and cellular  
44 maintenance [1] [2]. It is known that aging dramatically alters gene expression and transcription  
45 factor activity [3]. The protein family of Forkhead Box subfamily O transcription factors, or  
46 FOXO, has been known to play a role in growth, development, stress resistance, and longevity  
47 [4]. FOXO functions downstream of insulin receptor and is negatively regulated by kinase Akt

48 [5]. FOXO transcription factors control numerous pathways involving metabolism, cell cycle  
49 progression, stress, and apoptosis [6-9]. Additionally, FOXO proteins were first implemented in  
50 lifespan extension in *C. elegans* where insulin-like receptor mutant *daf-2* extends lifespan via  
51 FOXO homolog *daf-16* [10]. This lifespan extension through insulin/insulin-like growth factor  
52 signaling (IIS) has been observed across species, from worm to fly to mammal [10-12]. Studies  
53 have found in these organisms that dietary restriction or insulin deficiency is enough to promote  
54 FOXO nuclear localization and induce lifespan extension by targeting key longevity assurance  
55 pathways such as autophagy [13, 14]. However, a full comprehension of how FOXO elicits this  
56 response remains to be fully elucidated.

57 FOXO activity is not solely dependent on insulin activity. FOXO proteins undergo  
58 posttranslational modifications in response to other cellular stress signals. Oxidative stress can  
59 trigger Jun-N terminal Kinase (JNK) activation of FOXO in *Drosophila*, and mammalian Sterile  
60 20-like kinase 1(MST1) activates *daf-16* in worms which allows for FOXO targeting of  
61 antioxidant genes [15-17]. In response to DNA damage, Cyclin-dependent kinase 2(CDK2) can  
62 phosphorylate and regulate FOXO1 to delay cell cycle progression and induce apoptosis [18].  
63 FOXO proteins are also involved in tumor suppression activity and responds to oncogenic stress  
64 [15]. Interestingly, nuclear localization of FOXO has been observed not only under starvation or  
65 oxidative stress, but also under fed, non-stressed conditions [16, 19, 20]. Consistently, FOXO-  
66 DNA interactions were observed in both wild-type *C. elegans* and *Drosophila* [19, 21]

67 Despite many previous genomic analyses on DNA binding capacity of FOXO transcription  
68 factors and their target gene expression, the precise mechanisms underlying age-regulated FOXO  
69 transcriptional activity remain largely unclear. Here, we conducted a chromatin  
70 immunoprecipitation with next generation sequencing (ChIP-seq) analysis to investigate FOXO

71 binding dynamics under normal aging in *Drosophila*. Intriguingly, FOXO-bound peaks with  
72 aging sharply decrease with age. The age-related decline of FOXO binding is correlated with the  
73 expression profile of many FOXO target genes during aging. Furthermore, we observed FOXO  
74 targets distinct sets of genes between wild-type flies and insulin mutants. Thus, our findings  
75 provide new evidence linking age-dependent FOXO transcriptional activity to its role in  
76 longevity control and tissue maintenance.

77

## 78 **Results**

### 79 **FOXO exhibits constitutive nuclear localization in young and old adult fat body**

80 Although mutations that block IIS and activate FOXO signaling often extend lifespan,  
81 how IIS and FOXO are altered during aging is not well characterized. To examine whether  
82 FOXO activity changes with aging, we first performed immunofluorescent staining using a  
83 polyclonal antibody against *Drosophila* FOXO (hereafter referred to as FOXO) to monitor the  
84 FOXO nuclear localization in wild-type flies at two different ages, two-week-old and five-week-  
85 old. Surprisingly, the abdominal fat body tissue of wild-type flies exhibited constitutive FOXO  
86 nuclear localization in both young and old flies (Figure 1A). It is also interesting that high levels  
87 of FOXO nuclear localization were observed in well-fed young flies, where insulin is  
88 presumably present and FOXO would be inactivated (Figure 1A). The constitutive nuclear  
89 localization of FOXO was also found in another wild-type line, *Oregon R* (*OreR*), but not in a  
90 *foxo* mutant line, *yw; +; foxo<sup>21</sup>*. The total colocalization of FOXO with nuclear DAPI staining  
91 shows higher levels of nuclear FOXO in young flies compared to older and *foxo* mutant flies  
92 (figure 1B). Compared to adult fat body, indirect flight muscles from both one-week-old and

93 five-week-old flies showed low overlap between FOXO staining and nuclear DAPI staining at  
94 both ages (Figure 1C & 1D).

95 We next conducted western analysis to distinguish changes in protein abundance with  
96 aging. The purpose of this is three-fold: first, to see if downstream targets of insulin signaling  
97 undergo post-translational changes with age. Second, to confirm FOXO protein expression with  
98 age, and thirdly, to verify our *foxo* mutant. We observed an increase in phosphorylated Akt  
99 protein with aging (Figure S1). We also saw FOXO protein expression in both the young and the  
100 old wild- type *yw<sup>R</sup>* flies and confirmed a lack of full-length FOXO expression in *yw; +; foxo<sup>21</sup>*  
101 (Figure S1). Thus, we establish that FOXO protein is expressed under non-starvation conditions,  
102 and this expression persists with aging.

### 103 **ChIP-seq analysis reveals age-dependent decline of FOXO-targeted DNA binding**

104 To further investigate the transcription activity of nuclear localized FOXO under aging,  
105 ChIP-seq analysis on was performed using young (2-week) and old (5-week) female wild-type  
106 flies (Figure 2A). Using Illumina sequencing (HiSeq 3000, single-end, a read length of 50 base  
107 pair), we obtained a total of 261 million reads from 8 library samples. On average, 90.08% of  
108 unique reads were mapped to annotated *Drosophila* reference genome.

109 Intriguingly, our ChIP-Seq analysis revealed that the FOXO binding activity dramatically  
110 decreased with age, despite constitutive nuclear localization of FOXO at old age (Figure  
111 2B&2D). For most of the peaks, a reduction in peak size or a disappearance of peaks altogether  
112 was observed in aged flies (Figure 2B). The strong reduction of FOXO-bound peaks was neither  
113 due to the reduced expression of FOXO protein (Figure S1A), nor the binding affinity between  
114 FOXO and genome. The aged fly shows more variable overall DNA concentrations of  
115 immunoprecipitated FOXO-bound chromatin compared to the young fly, with an average

116 91.89% overall alignment to the Dm6 genome (Figure S2A and S2B). A comparative analysis of  
117 alignment data shows the 2-week-old FOXO ChIP samples to be most divergent from the non-  
118 immunoprecipitated input samples and 5-week-old ChIP samples, further supporting the decline  
119 of specific FOXO binding activity at old ages (Figure 2C).

120 Through FOXO ChIP-Seq, we identified 9273 FOXO-associated peaks from young flies  
121 (corresponding to 2617 unique protein coding genes), while only 1220 peaks corresponding to  
122 224 genes were identified from old flies (Figure 2D). Pathway analysis revealed that FOXO  
123 target genes at young ages were enriched in pathways like Wnt, Hippo, MAPK pathways, and  
124 nervous system development and regulation (Figure 2D). FOXO was also targeting genes  
125 involved in synaptic tissue communication and motor neuron stabilization, such as Fascillin 2  
126 (*Fas2*). Many of these peaks were absent in aged flies. Additionally, we found FOXO bound to  
127 genes that are important for autophagy regulation (*Atg3*, *Atg17*, *Tor*, *wdb*, *Pten*). Many Rho and  
128 small GTPase proteins appeared in our young FOXO dataset, suggesting a link between FOXO  
129 and the regulation of actin cytoskeleton. In the old flies, processes like cytokine mediation of  
130 inflammation and chromatin organization were enriched (Figure 2D). We found 170 shared  
131 target genes between two ages, with additional peaks enriched in old flies that did not overlap  
132 with the young dataset, suggesting that FOXO binding to specific pathways of growth and  
133 cellular maintenance are lost with age. FOXO binding at peak sites was verified by ChIP library  
134 preparation followed by gene specific qPCR. The promoter of the insulin receptor gene *InR* is  
135 known to be a target of FOXO [22]. Wild-type young fed flies showed no significant change in  
136 binding to the *InR* promoter compared to old flies (Figure 2E). Binding to the known FOXO-  
137 regulated gene *brummer* [23, 24] exhibited a decline in promoter binding with age (Figure 2F).

138 This was compared to the ChIP-identified target Jim, which showed a significant 10-fold  
139 reduction with aging (Figure 2G), validating our ChIP results.

#### 140 **FOXO-bound genes show age-dependent transcriptional changes**

141 We next examined whether age-dependent changes in FOXO binding is correlated to age-  
142 regulated transcription of FOXO target genes. To do so, we first compared our FOXO ChIP-seq  
143 results to previously published aging transcriptome data. Two *Drosophila* tissue datasets were  
144 used, one for transcriptional alterations in the aging fat body, and one for changes in head tissue  
145 with aging. We compared genes that were only present in the 2-week data set against the aging  
146 transcriptome profiles. From our 2447 FOXO-bound genes unique to young flies, we found 408  
147 of them (15.3%) overlapping with the aging fat body transcriptome. 172 of these genes were  
148 downregulated, while a total of 236 genes were upregulated under aging (Figure 3A). A  
149 functional analysis of both overlapping gene sets revealed pathways involving neuroactive  
150 ligand-receptor signaling, peroxisome function, and Hippo signaling we both targeted by FOXO  
151 in young flies and also exhibited transcriptional changes with aging (Figure 3B, supplementary  
152 table 1). On the other hand, when comparing to aging head transcriptome data, we found that  
153 among 1450 genes that increase expression with aging, 219 of them were bound by FOXO only  
154 at young ages. Meanwhile, 626 of 1632 genes that were downregulated in the head showed  
155 overlap with FOXO ChIP-seq data (Figure 3C). These overlapping genes were enriched for  
156 functional processes involving Wnt, Hippo, insulin resistance, motor neuron axon guidance,  
157 MAPK/EGFR signaling (Figure 3D, supplementary table 1). 11 members of the defective  
158 proboscis extension response (Dpr) gene family as well as several Dpr-interacting protein (DIP)  
159 genes had altered regulation in the aging head and overlapped with FOXO binding  
160 (Supplementary table1). Many of these targeted genes that are involved in neuronal function and

161 synaptic transmission are not present in the 5-week old flies, suggesting FOXO serves as a  
162 regulator of neuronal signaling in head tissue (supplementary table 1). Altogether, this data  
163 suggests that decreased FOXO-binding activity at old ages may contribute to age-dependent  
164 transcriptional changes of these FOXO target genes.

### 165 **FOXO binding differs between wild-type and insulin mutants**

166 FOXO binding activity has been primarily studied by evaluating its response to IIS  
167 signaling [19, 21, 25-27]. However, our observations on FOXO nuclear localization and DNA  
168 binding in well-fed wild-type flies suggest that there might be distinct FOXO transcriptional  
169 activity independent of IIS signaling. To test this, we compared FOXO ChIP-Seq datasets from  
170 the present study (young wild-type) and our previous analysis using *Chico* mutants [25]. Despite  
171 an overlap of 625 genes, there were 1992 genes unique to wild-type, and 1393 genes unique to  
172 *Chico* mutants (Figure 4A). Gene ontology analysis revealed that the overlapping set was  
173 enriched for processes involving synaptic transmission, cytoskeleton organization, and responses  
174 to endogenous stimuli. Both sets contained genes involved in the Hippo signaling pathway and  
175 the MAPK cascade, though different targets were apparent between the two datasets  
176 (Supplementary figure S4, S5, and S6). From the 1992 genes unique to the wild-type ChIP  
177 dataset, we found further enrichment of genes involving Hippo signaling and MAPK signaling  
178 (e.g., *Egfr*, *sev*, and *kay*), as well as enrichment of Wnt and Hedgehog signaling. Among the  
179 1393 unique FOXO targets in *Chico* mutants, genes involved in metabolism were significantly  
180 enriched. We further compared the aging transcriptome datasets for head and fat body with  
181 FOXO ChIP-Seq results. About 844 age-regulated genes were bound by FOXO in wild-type  
182 flies, while 577 genes unique to *Chico* mutants (Figure 4B). We found that age-regulated FOXO  
183 target genes that are unique to *Chico* mutants were enriched for pathways in lipid metabolism



184 and JNK signaling, while those unique to wild-type flies were enriched for Wnt signaling, Hippo  
185 signaling, and MAPK/EGFR signaling pathways (Figure 4C).

186 To test if distinct FOXO binding activity observed in wild-type flies is conserved across  
187 species, we compared our *Drosophila* FOXO ChIP-seq data with recent *C. elegans* Daf-16 ChIP-  
188 seq analyses. Intriguingly, wild-type worms also showed different Daf-16 binding activity from  
189 *daf-2* mutants. There were 2296 Daf-16 bound genes unique to wild-type worms, while 996 were  
190 unique to *daf-2* mutants (Figure 4D). Pathway analysis showed that both flies and worms exhibit  
191 FOXO and Daf-16 both target genes in pathways like cytoskeleton organization, axon guidance,  
192 and MAPK signaling (Figure 4E). The shared FOXO-targeting pathways found in wild-type flies  
193 and worms suggest that FOXO localization to target genes is not exclusively dependent upon  
194 insulin deficiency.

#### 195 **Enriched motifs from wild-type flies correspond with known FOXO co-factors**

196 A hallmark of FOXO targeting is the 8-nucleotide long canonical binding motif 5'-  
197 TTGTTTAC-3' found across species [25, 28, 29]. This motif is typically found upstream of the  
198 gene coding site in the enhancer or promoter region [29, 30]. We conducted motif analysis using  
199 the Homer motif finding tool to search for FOXO consensus sequence in our ChIP-Seq data. For  
200 the 2-week wild-type flies, we used peaks with at least a 2-fold enrichment that were less than  
201 2000bp in length, resulting in 5718 peaks. Using Homer to analyze genomic positions, we  
202 searched for motifs within 200bp surrounding the peak region. When using insect motif  
203 database, we found enrichment for only one known transcription factor motif, Trl ( $p < 10^{-70}$ ), a  
204 GAGA-factor that also found in previous ChIP-seq data from *C. elegans* [21] (Figure 5). A *de*  
205 *novo* motif search revealed that FOXO-bound regions enriched with motifs for transcription  
206 factors hb, Adf1, and Aef1. Homer *de novo* motif search identified another motif for RAP1, a

207 *Saccharomyces cerevisiae* gene that is part of the Myb/SAINT domain family, which is  
208 consistent with previous study by Alic et al 2011 [19]. However, Homer failed in detecting a  
209 canonical FOXO motif. When searching against known mammalian motifs, a motif for FOXO1  
210 was detected with low significance ( $p < 10^{-4}$ ) (Table 1). Therefore FOXO may recognize a  
211 unique motif in wild-type flies that is different from insulin mutants.

212

## 213 **Discussion**

214 As a key player in longevity control [10, 31, 32], FOXO transcription factors and their  
215 direct targets have been well characterized in many model systems [19, 21, 25, 27, 29, 30, 33,  
216 34]. However, whether and how FOXO transcriptional activity changes with age is unknown. In  
217 the present study, we performed ChIP-Seq analysis to examine the FOXO binding activity during  
218 *Drosophila* aging. Intriguingly, whole genome FOXO-binding underwent an immense reduction  
219 at old ages, even though FOXO protein expression and nuclear localization did not show age-  
220 dependent changes. In addition, we found that FOXO presents in the nucleus of fat body tissue  
221 and binds to DNA under normal feeding conditions, suggesting FOXO is transcriptionally  
222 activated despite a lack of nutritional stress. Thus, we have discovered a novel age- and  
223 nutrition-independent FOXO transcriptional activation.

224 FOXO cofactors play an important role in FOXO differential DNA binding and  
225 transcriptional activity [16, 19, 21, 27, 35-37]. These co-factors include post-translational  
226 modifiers and nuclear interacting partners which aid FOXO in recruitment to target binding sites  
227 [38, 39]. We have seen in previous reports that FOXO targeted genes with age-differentiated  
228 expression are also targeted by other transcriptional regulators, suggesting that the interplay  
229 between FOXO and these transcription factors becomes altered during the aging process [27].

230 Changes in transcription factor binding patterns at different stages of life are not exclusive to  
231 FOXO. In *C. elegans*, FoxA/PHA-4 exhibits differential binding patterns at different stages of  
232 development to regulate organogenesis. PHA-4 also exhibited binding at poised locations in the  
233 genome, similar to the observations made for FOXO in this study [40]. Our own data supports a  
234 loss of specific FOXO targeting with age, and this is possibly due to a decline in post-  
235 translational modifier activity and a reduction in FOXO-protein partner DNA binding. Certain  
236 mammalian FOXO cofactors, such as peroxisome proliferator-activated receptor gamma  
237 (PPAR $\gamma$ ), and its coactivator (PGC-1 $\alpha$ ) interact with FOXO and compete for binding with  
238 FOXO and b-Catenin [41, 42]. FOXO acts as a repressor of PPAR $\gamma$  gene transcription, and this  
239 repression is lost later in life, suggesting a reduction of FOXO binding at this gene loci [42, 43].  
240 This, along with other transcription factor co-regulators and post-translational modifiers  
241 influence FOXO's control of longevity [38, 44-46].

242 Target genes in young flies were functionally responsible for pathways involving growth,  
243 development, and cell maintenance as well as axon guidance and neuronal development. These  
244 pathways become transcriptionally altered with age. Young wild-type FOXO targets also showed  
245 unique genes and pathways when compared to FOXO targets identified in young *chico* mutants.  
246 FOXO binding has been previously linked to pathways involving tumorigenesis and regulation  
247 of cellular homeostasis [47]. One such pathway that is enriched among our wild-type FOXO  
248 targets is the Hippo signaling pathway. Genes involved in Hippo signaling were present in both  
249 wild-type and *chico* datasets, while further enrichment of the pathway was also found in the  
250 unique wild-type targets (Supplementary table 1, supplementary figure S4). Young fly FOXO  
251 targets that underwent a transcriptional change with age were also enriched for Hippo signaling.  
252 The Hippo pathway was initially characterized for its role in controlling organ size during

253 development, but it also regulated pathways involving autophagy and oxidative stress response  
254 [48, 49]. These activities overlap with known FOXO functional behaviors [7, 20, 50]. In adult  
255 mice, suppression of Hippo signaling improved cell proliferation and heart tissue regeneration  
256 and is a regulator of tissue homeostasis [51]. These findings indicate Hippo signaling is targeted  
257 by FOXO and may regulate homeostatic activity, which becomes altered with age.

258         MAPK signaling is involved in tissue homeostasis with aging and was enriched among  
259 young FOXO-bound target genes [52, 53]. FOXO targets were found to correspond to both the  
260 EGFR and JNK cascades, and target genes involved in the EGFR pathway exhibited  
261 transcriptional alterations with age in the wild-type fly. In adult *Drosophila*, EGFR signaling is  
262 responsible for maintaining midgut epithelial homeostasis in the adult and has also been shown  
263 to regulate cytoskeletal modulation and autophagy [52, 54, 55]. EGFR regulation of autophagy  
264 also impacts glial maintenance and degeneration of the nervous system [53]. Our data supports  
265 FOXO targets the EGFR pathway and may serve as an upstream regulator of these processes.

266         Surprisingly, we found many FOXO-bound peaks appeared at histone coding regions,  
267 and this number increased with age. This suggests FOXO has some involvement in the  
268 maintenance of chromatin structure. This is supported by previous research highlighting that  
269 FOXO recruits SWI/SNF chromatin remodelers to specific target sites [21]. Changes in  
270 chromatin structure and overall loss of heterochromatin has long been an indicative measurement  
271 of aging [56-58]. Therefore, it is possible that FOXO is required for maintaining chromatin  
272 structure and may serve as a repressor for specific gene targets.

273         In summary, using a genome-wide approach we were able to observe the dynamic nature  
274 of FOXO binding, and found an overall reduction of gene targeting with age in the wild-type fly.  
275 Our findings support FOXO as important regulator of processes that undergo changes with age.

276 This reinforces FOXO's role in the regulation of homeostasis and cellular maintenance  
277 pathways. Further investigation of the function of this decline in FOXO binding with age will be  
278 important in understanding how FOXO regulates organismal homeostasis and longevity.

279

## 280 **Methods**

### 281 *Fly lines*

282 *ywR*;+;+ (Rochele) flies were used as wild-type for ChIP-seq. *ywR*;+;*foxo*<sup>21</sup> line serves as  
283 FOXO mutant flies. Females were collected and sorted 1-2 days after eclosion and placed in  
284 vials containing standard CSY food. Fly strains were maintained at 25 °C with 12 hour light/dark  
285 cycle, and 60% humidity. Vials contained 25-30 flies to prevent overcrowding and were  
286 transferred to fresh food every three days. Flies were aged to 2-weeks old (12-14 days) for both  
287 *ywR* and *foxo*<sup>21</sup> mutant lines, and 5-weeks old (34-36 days) for *ywR* aged specimens.

### 288 *Immunofluorescent staining*

289 Flies were subjected to flynap (Carolina, Burlington, NC) and dissected in 1X phosphate buffer  
290 saline (PBS). Tissue was then fixed in 4% paraformaldehyde for 20 minutes at room  
291 temperature. Tissue was washed in 1X PBST (0.1% Triton X) and blocked with 5% NGS for 1  
292 hour at room temperature. Tissue was stained with  $\alpha$ -FOXO antibody (Tatar Lab) in 1X PBST at  
293 a dilution of 1:1000 for 16 hours at 4 °C on a rotator. Tissues were placed in secondary anti-body  
294 goat-anti-rabbit conjugate Alexa Fluor 488 (Jackson ImmunoResearch Laboratories Inc, West  
295 Grove PA) at a Dilution of 1:250 and kept in the dark at room temperature for 2 hours. The  
296 nucleus was stained using SlowFade with DAPI () and tissues were stored at 4 °C overnight prior  
297 to plating. Images were captured using an epifluorescence-equipped BX51WI microscope

298 (Olympus, Waltham, MA, USA). and CellSens software (Olympus, Waltham, MA, USA) for  
299 deconvolution. Images were compiled using Fiji [59].

300 *ChIP*

301 ChIP-PCR protocol was performed and modified from [25]. Two biological replicates were  
302 collected for each age and genotype. For Crosslinking, ~200 female flies were anesthetized with  
303 Flynap (Carolina, Burlington, NC, USA) and ground into a powder in liquid nitrogen.  
304 Crosslinking was allowed for 20 minutes in 1X PBS with 1% paraformaldehyde before quenched  
305 with glycine. Chromatin was washed several times with 1X PBS supplemented with protease  
306 inhibitor (PIC). Pellets were washed once with cold cell lysis buffer (5mM HEPES pH7.6,  
307 100mM NaCl, 1M EDTA, 0.5% NP-40, ddH<sub>2</sub>O, 0.1% PIC). Buffer was removed and samples  
308 were snap frozen in liquid nitrogen and stored at -80 °C to synchronize experiments. Samples  
309 were thawed and treated with nuclear lysis buffer (50mM HEPES pH7.6, 10mM EDTA, 0.1%  
310 Na-deoxycholate, 0.5% N-lauroylsarcosine, ddH<sub>2</sub>O, 0.1% PIC) and incubated at 4 °C for 10  
311 minutes. Chromatin was sheared for 500bp using Branson digital sonifier 250, using 30%, with  
312 30 seconds on 30 seconds Off for 5 cycles. Supernatant was snap frozen and stored at -80 °C.  
313 Immunoprecipitation was carried out using Protein-G SureBeads (BioRad Hercules, CA, USA).  
314 Beads were washed once with 1X PBS prior to blocking with 1X PBS and 0.5% BSA for 20  
315 minutes at 4 °C. Samples were precipitated with affinity purified anti-dFOXO antibody (Tatar  
316 Lab). Samples were reverse crosslinked at 65 °C for 12 hours.

317 DNA size selection and library prep were done using NEBNext Ultra II DNA library prep kit for  
318 Illumina an indexed using NEBNext multiplex oligos for Illumina (Primer set 1) (New England  
319 BioLabs, Ipswich, MA, USA). DNA from either ChIP or input samples was mixed with AMPure  
320 XP beads (Beckman Coulter, Inc. Brea, CA, USA) to select for a final library size of 320bp.

321 Samples were diluted to a final concentration of 2nM for Illumina sequencing on Illumina 3000  
322 (Illumina, San Diego, CA, USA).

### 323 *Processing of ChIP-seq data*

324 Raw FASTQ reads were merged using mergePeaks (Homer suite) then uploaded into Galaxy  
325 (usegalaxy.org) and checked for quality using FastQC (Andrews; figure S\*). Files were then run  
326 through FASTQ Groomer (<https://usegalaxy.org/u/dan/p/fastq>) for readability control before  
327 mapping reads using Bowtie2 for single-end reads (Langmead and Salzberg 2012). D.  
328 melanogaster Aug.2014 (BDGP Release 6 + ISO1 MT/dm6) was used as the reference sequence.  
329 BAM output files were converted to SAM using BAM-to-SAM  
330 (<http://www.htslib.org/doc/samtools.html>) and sorted (Li 2009, SAMTools) to generate peak  
331 images in Figure 2C. Peak calling was performed using MACS2. MACS2 FDR (q-value) was set  
332 for a peak detection cutoff of 0.05 and did not build the shifting model. The MFOLD for the  
333 model was set from 10-50 to detect fold-enrichment as specified by Feng et al 2012 [60]. Peak-  
334 calling was set to identify peaks 300bp in length, and no peaks could exceed 10Kb in size. After  
335 MACS2 peak identification, peak regions were expanded 2kb (1kb upstream and downstream)  
336 and assigned to nearby and overlapping genes using BEDTools/intersect  
337 (<https://bedtools.readthedocs.io/en/latest/content/bedtools-suite.html>) with dm6.16 genome  
338 annotation file (UCSC, Santa Cruz, CA, USA). All non-protein coding identified targets were  
339 removed from the data set manually based on annotation symbol (CG vs CR).

### 340 *Venn Diagrams*

341 Venn diagram were created using the Bioinformatics and Evolutionary Genomics Venn  
342 calculator at Ugent (<http://bioinformatics.psb.ugent.be/webtools/Venn/>). For cross species

343 comparisons, gene ID's were converted to fly ID's using DIOPT (<http://www.flyrnai.org/diopt>).

344 Genes that were the best possible match for each ortholog were selected for gene list comparison.

#### 345 *qPCR*

346 Quantitative PCR was run on ChIP purified samples (QuantStudio, ThermoFisher Scientific,

347 Waltham, MA USA). Cybergreen (Life Technologies, CA, USA) was used for chemical

348 detection. Enrichment was determined based on the double-delta CT value. Two technical

349 replicates were used per sample. Primer list in Figure S7.

#### 350 *Pathway and GO functional analysis*

351 Geneset functional analysis was conducted using Panther (<http://www.pantherdb.org/>), String

352 (<https://string-db.org/>) and DAVID (<https://david.ncifcrf.gov/>). All three methods were used to

353 obtain a more complete picture of shared regulation between datasets. KEGG pathway maps

354 were obtained through KEGG Pathway (<http://www.kegg.jp/kegg/pathway.html>).

#### 355 *Motif analysis*

356 Motif analysis was conducted using Homer's *findMotifsGenome* script

357 (<http://homer.ucsd.edu/homer/ngs/peakMotifs.html>, [61]) to compare peak regions with dm6.01

358 FASTA data from UCSC.

#### 359 *List of raw datasets used*

360 ChIP-seq datasets: GSE62580 (*Drosophila* Fat body DE), GSE81100 (*Drosophila* aging head

361 DE), GSE81221 (S2R+ FOXO RNAi RNA-seq), GSE44686 (*Drosophila Chico* heterozygotes

362 dFOXO ChIP), GSE15567 (Encode *C. elegans Daf-16* ChIP)

#### 363 *Statistical analysis*



364 GraphPad Prism (GraphPad Software, La Jolla, CA, USA) was used for statistical analysis. To  
365 compare the mean value of treatment groups versus that of control, either student t-test or one-  
366 way ANOVA was performed using Dunnett's test for multiple comparison.

367

### 368 **Acknowledgements**

369 We thank Usha Muppirla and Andrew Severin from the Genome Informatics Facility (GIF) at  
370 Iowa State University for assistance with bioinformatics. We thank Christian Riedel for  
371 providing peak data from *C. elegans*.

372

### 373 **Figure Legends**

374

375 **Figure 1. Immunofluorescent staining of dFOXO in 1 and 5-week old yellow-white flies and**  
376 **in 1-week old Oregon-R and *foxo*<sup>21</sup> mutants.** **A)** Drosophila abdominal fat body tissue stained  
377 with anti-dFOXO followed Alexa-fluor-488 and DAPI **B)** ) Overlap between FOX- DAPI  
378 staining in fat body tissue (\*\*P< 0.001, \*\*\*\*P<0.0001) **C)** Tissue from Drosophila indirect  
379 flight muscles stained with anti-dFOXO followed Alexa-fluor-488 and DAPI. **D)** Overlap  
380 between FOX- DAPI staining in muscle tissue (\*P< 0.05).

381

382 **Figure 2. FOXO targeted enrichment decreases with age.** **A)** A pictogram of the workflow  
383 used to analyze ChIP-seq reads acquired from Illumina 3000. **B)** 2-week old flies have more  
384 enriched peaks compared to 5-week old flies. Pathways enriched in younger flies contain known  
385 FOXO regulated pathways involving growth and cell cycle progression as well as pathways  
386 involving G-protein Couple Receptors. **C)** Alignment data shows enrichment of reads at FOXO  
387 targeted regions in young flies that are not present in old flies at the Aux TSS. **D)** Plot correlation

388 Matrix shows 5 week-old flies are most similar to input samples, supporting low FOXO binding  
389 activity. **E-G**) qPCR or ChIP library samples at peak regions for insulin receptor, *Bmm*  
390 (\* $P < 0.05$ ), and Jim in young and old ywR flies (\*\*\*\* $P < 0.0001$ ).

391

392 **Figure 3. Wild-type FOXO-bound genes unique to young flies show transcriptional changes**  
393 **with age.** A) Overlap of FOXO target genes with genes altered with age in the fat body tissue. B)  
394 Representative biological processes enriched through gene ontology of overlapping genes with  
395 aging fat body tissue. C) Overlap between FOXO target genes and transcriptome data  
396 between 10-60 day head tissue **D**) Representative biological processes enriched through gene  
397 ontology of overlapping genes with aging head tissue.

398

399 **Figure 4. Wild-type FOXO-targets are distinct from those associated with insulin signaling.**  
400 **A**) Venn diagram of wild-type and chico ChIP-seq FOXO target genes. **B**) wild-type and chico  
401 FOXO-bound genes overlapped with genes differentially expressed during aging. Differentially  
402 expressed genes were acquired from aging transcriptome data sets from the head and fat body.  
403 **C**) GO analysis for unique genesets overlapping with the aging transcriptome reflect distinct  
404 pathways that become differentially regulated with aging. **D**) Wild-type FOXO targets show  
405 little overlap with transcriptional data from insulin receptor mutants. **E**) Wild-type *C. elegans*  
406 share only a subset of overlap with *daf-2* mutants similar to wild-type and chico *Drosophila* **F**)  
407 Wild-type *Drosophila* share many pathways and processes with wild-type *C. elegans* Daf-16  
408 targets.

409

410 **Figure S1.** Western blotting analysis on insulin signaling in young and old wild-type and *foxo*<sup>21</sup>  
411 mutants.

412 **Figure S2.** Concentration of ChIP DNA samples before library preparation.

413 **Figure S3.** Total raw reads and Bowtie alignment percentage for individual sequencing sample.

414 **Figure S4.** FOXO targets in hippo signaling pathway. Blue: Wild-type only. Pink: *Chico* mutant  
415 only. Green: Shared.

416 **Figure S5.** FOXO targets in MAPK/EGFR pathway. Blue: Wild-type only. Pink: *Chico* mutant  
417 only. Green: Shared.

418 **Figure S6.** FOXO targets in JNK signaling pathway. Blue: Wild-type only. Pink: *Chico* mutant  
419 only. Green: Shared.

420 **Figure S7.** Primers used for ChIP qPCR. Results normalized against Act5C control expression.

421

## 422 **References:**

- 423 1. Dice, J.F., *Cellular and molecular mechanisms of aging*. *Physiol Rev*, 1993. **73**(1): p. 149-59.
- 424 2. Cui, H., Y. Kong, and H. Zhang, *Oxidative stress, mitochondrial dysfunction, and aging*. *J Signal*  
425 *Transduct*, 2012. **2012**: p. 646354.
- 426 3.
- 427 4. Greer, E.L. and A. Brunet, *FOXO transcription factors at the interface between longevity and*  
428 *tumor suppression*. *Oncogene*, 2005. **24**(50): p. 7410-25.
- 429 5. Brunet, A., et al., *Akt promotes cell survival by phosphorylating and inhibiting a Forkhead*  
430 *transcription factor*. *Cell*, 1999. **96**(6): p. 857-68.
- 431 6. Kitamura, T., et al., *The forkhead transcription factor Foxo1 links insulin signaling to Pdx1*  
432 *regulation of pancreatic beta cell growth*. *J Clin Invest*, 2002. **110**(12): p. 1839-47.
- 433 7. Kops, G.J., et al., *Forkhead transcription factor FOXO3a protects quiescent cells from oxidative*  
434 *stress*. *Nature*, 2002. **419**(6904): p. 316-21.
- 435 8. Martins, R., G.J. Lithgow, and W. Link, *Long live FOXO: unraveling the role of FOXO proteins in*  
436 *aging and longevity*. *Aging Cell*, 2016. **15**(2): p. 196-207.
- 437 9. Medema, R.H., et al., *AFX-like Forkhead transcription factors mediate cell-cycle regulation by Ras*  
438 *and PKB through p27kip1*. *Nature*, 2000. **404**(6779): p. 782-7.
- 439 10. Kenyon, C., et al., *A C. elegans mutant that lives twice as long as wild type*. *Nature*, 1993.  
440 **366**(6454): p. 461-4.
- 441 11. Holzenberger, M., et al., *IGF-1 receptor regulates lifespan and resistance to oxidative stress in*  
442 *mice*. *Nature*, 2003. **421**(6919): p. 182-7.

- 443 12. Tatar, M., et al., *A mutant Drosophila insulin receptor homolog that extends life-span and*  
444 *impairs neuroendocrine function*. Science, 2001. **292**(5514): p. 107-10.
- 445 13. Fontana, L., S. Klein, and J.O. Holloszy, *Effects of long-term calorie restriction and endurance*  
446 *exercise on glucose tolerance, insulin action, and adipokine production*. Age (Dordr), 2010. **32**(1):  
447 p. 97-108.
- 448 14. Hansen, M., et al., *A role for autophagy in the extension of lifespan by dietary restriction in C.*  
449 *elegans*. PLoS Genet, 2008. **4**(2): p. e24.
- 450 15. Dansen, T.B. and B.M. Burgering, *Unravelling the tumor-suppressive functions of FOXO proteins*.  
451 Trends Cell Biol, 2008. **18**(9): p. 421-9.
- 452 16. Essers, M.A., et al., *FOXO transcription factor activation by oxidative stress mediated by the*  
453 *small GTPase Ral and JNK*. EMBO J, 2004. **23**(24): p. 4802-12.
- 454 17. Lehtinen, M.K., et al., *A conserved MST-FOXO signaling pathway mediates oxidative-stress*  
455 *responses and extends life span*. Cell, 2006. **125**(5): p. 987-1001.
- 456 18. Huang, H. and D.J. Tindall, *FOXO factors: a matter of life and death*. Future Oncol, 2006. **2**(1): p.  
457 83-9.
- 458 19. Alic, N., et al., *Genome-wide dFOXO targets and topology of the transcriptomic response to*  
459 *stress and insulin signalling*. Mol Syst Biol, 2011. **7**: p. 502.
- 460 20. Junger, M.A., et al., *The Drosophila forkhead transcription factor FOXO mediates the reduction in*  
461 *cell number associated with reduced insulin signaling*. J Biol, 2003. **2**(3): p. 20.
- 462 21. Riedel, C.G., et al., *DAF-16 employs the chromatin remodeller SWI/SNF to promote stress*  
463 *resistance and longevity*. Nat Cell Biol, 2013. **15**(5): p. 491-501.
- 464 22. Puig, O., et al., *Control of cell number by Drosophila FOXO: downstream and feedback regulation*  
465 *of the insulin receptor pathway*. Genes Dev, 2003. **17**(16): p. 2006-20.
- 466 23. Hossain, M.S., et al., *20-Hydroxyecdysone-induced transcriptional activity of FoxO upregulates*  
467 *brummer and acid lipase-1 and promotes lipolysis in Bombyx fat body*. Insect Biochem Mol Biol,  
468 2013. **43**(9): p. 829-38.
- 469 24. Kang, P., et al., *Drosophila Kruppel homolog 1 represses lipolysis through interaction with*  
470 *dFOXO*. Sci Rep, 2017. **7**(1): p. 16369.
- 471 25. Bai, H., et al., *Activin signaling targeted by insulin/dFOXO regulates aging and muscle*  
472 *proteostasis in Drosophila*. PLoS Genet, 2013. **9**(11): p. e1003941.
- 473 26. Murphy, L.J., *Insulin-like growth factor-I: a treatment for type 2 diabetes revisited*.  
474 Endocrinology, 2006. **147**(6): p. 2616-8.
- 475 27. Webb, A.E., A. Kundaje, and A. Brunet, *Characterization of the direct targets of FOXO*  
476 *transcription factors throughout evolution*. Aging Cell, 2016. **15**(4): p. 673-85.
- 477 28. Furuyama, T., et al., *Identification of the differential distribution patterns of mRNAs and*  
478 *consensus binding sequences for mouse DAF-16 homologues*. Biochemical Journal, 2000. **349**: p.  
479 629-634.
- 480 29. Webb, A.E., et al., *FOXO3 shares common targets with ASCL1 genome-wide and inhibits ASCL1-*  
481 *dependent neurogenesis*. Cell Rep, 2013. **4**(3): p. 477-91.
- 482 30. Eijkelenboom, A., et al., *FOXO3 selectively amplifies enhancer activity to establish target gene*  
483 *regulation*. Cell Rep, 2013. **5**(6): p. 1664-78.
- 484 31. Hwangbo, D.S., et al., *Drosophila dFOXO controls lifespan and regulates insulin signalling in brain*  
485 *and fat body*. Nature, 2004. **429**(6991): p. 562-6.
- 486 32. Willcox, B.J., et al., *FOXO3A genotype is strongly associated with human longevity*. Proc Natl  
487 Acad Sci U S A, 2008. **105**(37): p. 13987-92.
- 488 33. Schuster, E., et al., *DamID in C. elegans reveals longevity-associated targets of DAF-16/FoxO*.  
489 Mol Syst Biol, 2010. **6**: p. 399.

- 490 34. Teleman, A.A., et al., *Nutritional control of protein biosynthetic capacity by insulin via Myc in*  
491 *Drosophila*. Cell Metab, 2008. **7**(1): p. 21-32.
- 492 35. Brenkman, A.B., et al., *Mdm2 induces mono-ubiquitination of FOXO4*. PLoS One, 2008. **3**(7): p.  
493 e2819.
- 494 36. Brunet, A., et al., *Stress-dependent regulation of FOXO transcription factors by the SIRT1*  
495 *deacetylase*. Science, 2004. **303**(5666): p. 2011-5.
- 496 37. Sekine, K., et al., *Foxo1 links insulin signaling to C/EBPalpha and regulates gluconeogenesis*  
497 *during liver development*. EMBO J, 2007. **26**(15): p. 3607-15.
- 498 38. Daitoku, H., J. Sakamaki, and A. Fukamizu, *Regulation of FoxO transcription factors by*  
499 *acetylation and protein-protein interactions*. Biochim Biophys Acta, 2011. **1813**(11): p. 1954-60.
- 500 39. van der Vos, K.E. and P.J. Coffey, *FOXO-binding partners: it takes two to tango*. Oncogene, 2008.  
501 **27**(16): p. 2289-99.
- 502 40. Zhong, M., et al., *Genome-wide identification of binding sites defines distinct functions for*  
503 *Caenorhabditis elegans PHA-4/FOXA in development and environmental response*. PLoS Genet,  
504 2010. **6**(2): p. e1000848.
- 505 41. Olmos, Y., et al., *Mutual dependence of Foxo3a and PGC-1alpha in the induction of oxidative*  
506 *stress genes*. J Biol Chem, 2009. **284**(21): p. 14476-84.
- 507 42. Polvani, S., M. Tarocchi, and A. Galli, *PPARgamma and Oxidative Stress: Con(beta) Catenating*  
508 *NRF2 and FOXO*. PPAR Res, 2012. **2012**: p. 641087.
- 509 43. Armoni, M., et al., *FOXO1 represses peroxisome proliferator-activated receptor-gamma1 and -*  
510 *gamma2 gene promoters in primary adipocytes. A novel paradigm to increase insulin sensitivity*.  
511 J Biol Chem, 2006. **281**(29): p. 19881-91.
- 512 44. Klotz, L.O., et al., *Redox regulation of FoxO transcription factors*. Redox Biol, 2015. **6**: p. 51-72.
- 513 45. Singh, B.K., et al., *Hepatic FOXO1 Target Genes Are Co-regulated by Thyroid Hormone via RICTOR*  
514 *Protein Deacetylation and MTORC2-AKT Protein Inhibition*. J Biol Chem, 2016. **291**(1): p. 198-  
515 214.
- 516 46. van der Horst, A. and B.M. Burgering, *Stressing the role of FoxO proteins in lifespan and disease*.  
517 Nat Rev Mol Cell Biol, 2007. **8**(6): p. 440-50.
- 518 47. Accili, D. and K.C. Arden, *FoxOs at the crossroads of cellular metabolism, differentiation, and*  
519 *transformation*. Cell, 2004. **117**(4): p. 421-6.
- 520 48. Mao, B., et al., *Hippo signaling in stress response and homeostasis maintenance*. Acta Biochim  
521 Biophys Sin (Shanghai), 2015. **47**(1): p. 2-9.
- 522 49. Udan, R.S., et al., *Hippo promotes proliferation arrest and apoptosis in the Salvador/Warts*  
523 *pathway*. Nat Cell Biol, 2003. **5**(10): p. 914-20.
- 524 50. Zhou, Y., et al., *Growth control of multiple myeloma cells through inhibition of glycogen synthase*  
525 *kinase-3*. Leuk Lymphoma, 2008. **49**(10): p. 1945-53.
- 526 51. Heallen, T., et al., *Hippo signaling impedes adult heart regeneration*. Development, 2013.  
527 **140**(23): p. 4683-90.
- 528 52. Jiang, H., et al., *EGFR/Ras/MAPK signaling mediates adult midgut epithelial homeostasis and*  
529 *regeneration in Drosophila*. Cell Stem Cell, 2011. **8**(1): p. 84-95.
- 530 53. Lee, Y.M. and Y.H. Sun, *Maintenance of glia in the optic lamina is mediated by EGFR signaling by*  
531 *photoreceptors in adult Drosophila*. PLoS Genet, 2015. **11**(4): p. e1005187.
- 532 54. Hazan, R.B. and L. Norton, *The epidermal growth factor receptor modulates the interaction of E-*  
533 *cadherin with the actin cytoskeleton*. J Biol Chem, 1998. **273**(15): p. 9078-84.
- 534 55. Tan, X., et al., *Stress-Induced EGFR Trafficking: Mechanisms, Functions, and Therapeutic*  
535 *Implications*. Trends Cell Biol, 2016. **26**(5): p. 352-366.
- 536 56. Larson, J.L. and G.C. Yuan, *Chromatin states accurately classify cell differentiation stages*. PLoS  
537 One, 2012. **7**(2): p. e31414.

- 538 57. Wood, J.G., et al., *Chromatin remodeling in the aging genome of Drosophila*. *Aging Cell*, 2010.  
539 **9**(6): p. 971-8.
- 540 58. Zhang, W., et al., *Aging stem cells. A Werner syndrome stem cell model unveils heterochromatin*  
541 *alterations as a driver of human aging*. *Science*, 2015. **348**(6239): p. 1160-3.
- 542 59. Schindelin, J., et al., *Fiji: an open-source platform for biological-image analysis*. *Nat Methods*,  
543 2012. **9**(7): p. 676-82.
- 544 60. Feng, J., et al., *Identifying ChIP-seq enrichment using MACS*. *Nat Protoc*, 2012. **7**(9): p. 1728-40.
- 545 61. Heinz, S., et al., *Simple combinations of lineage-determining transcription factors prime cis-*  
546 *regulatory elements required for macrophage and B cell identities*. *Mol Cell*, 2010. **38**(4): p. 576-  
547 89.
- 548



# Figure 1

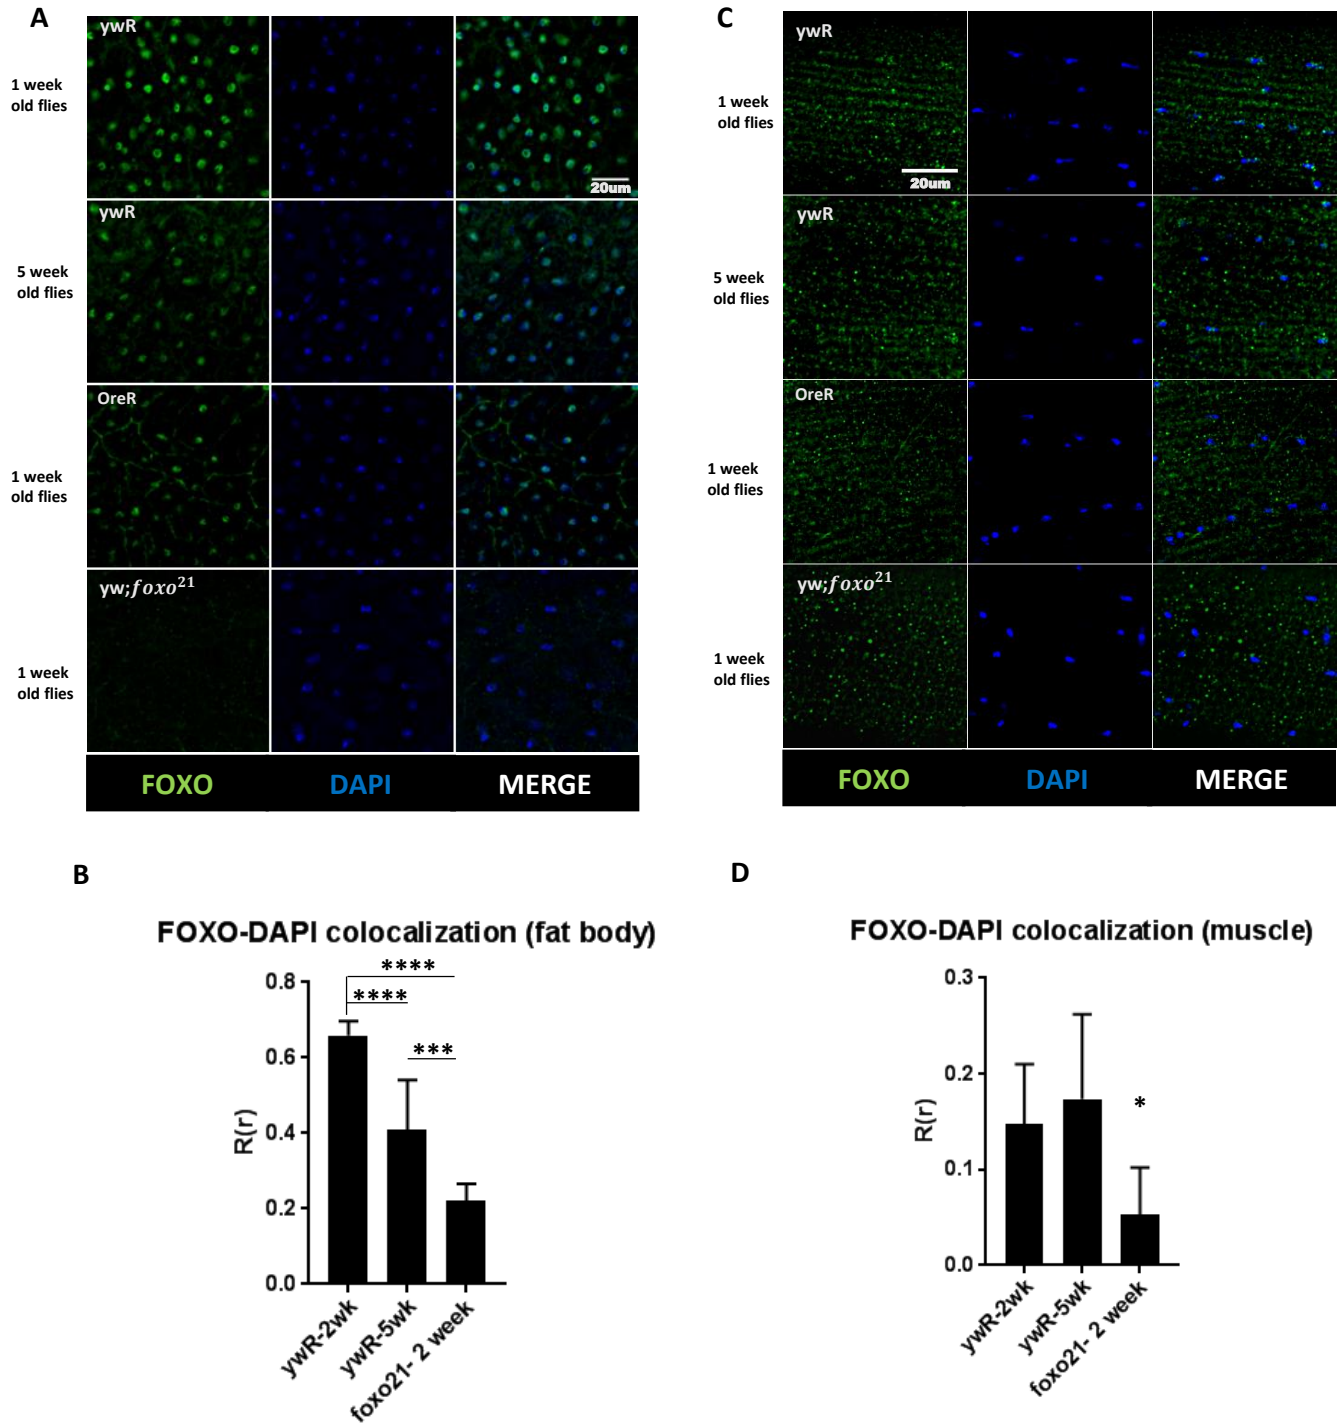

## Figure 2

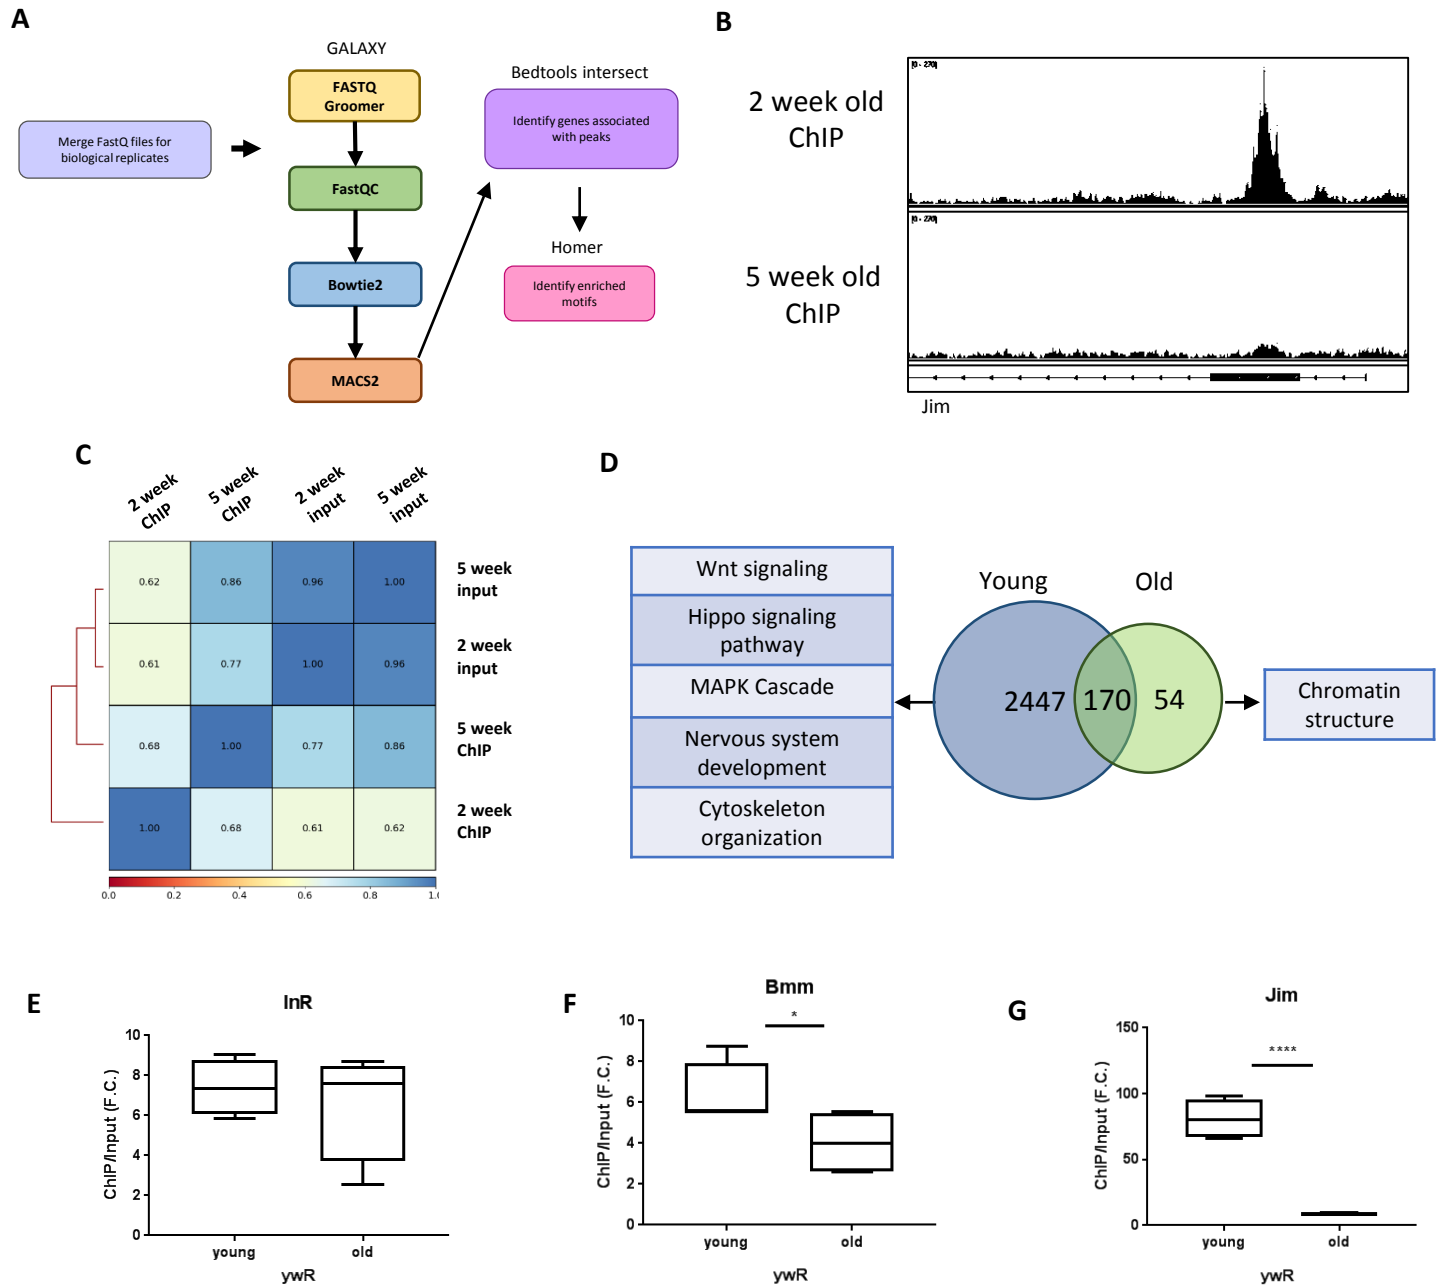



# Figure 3

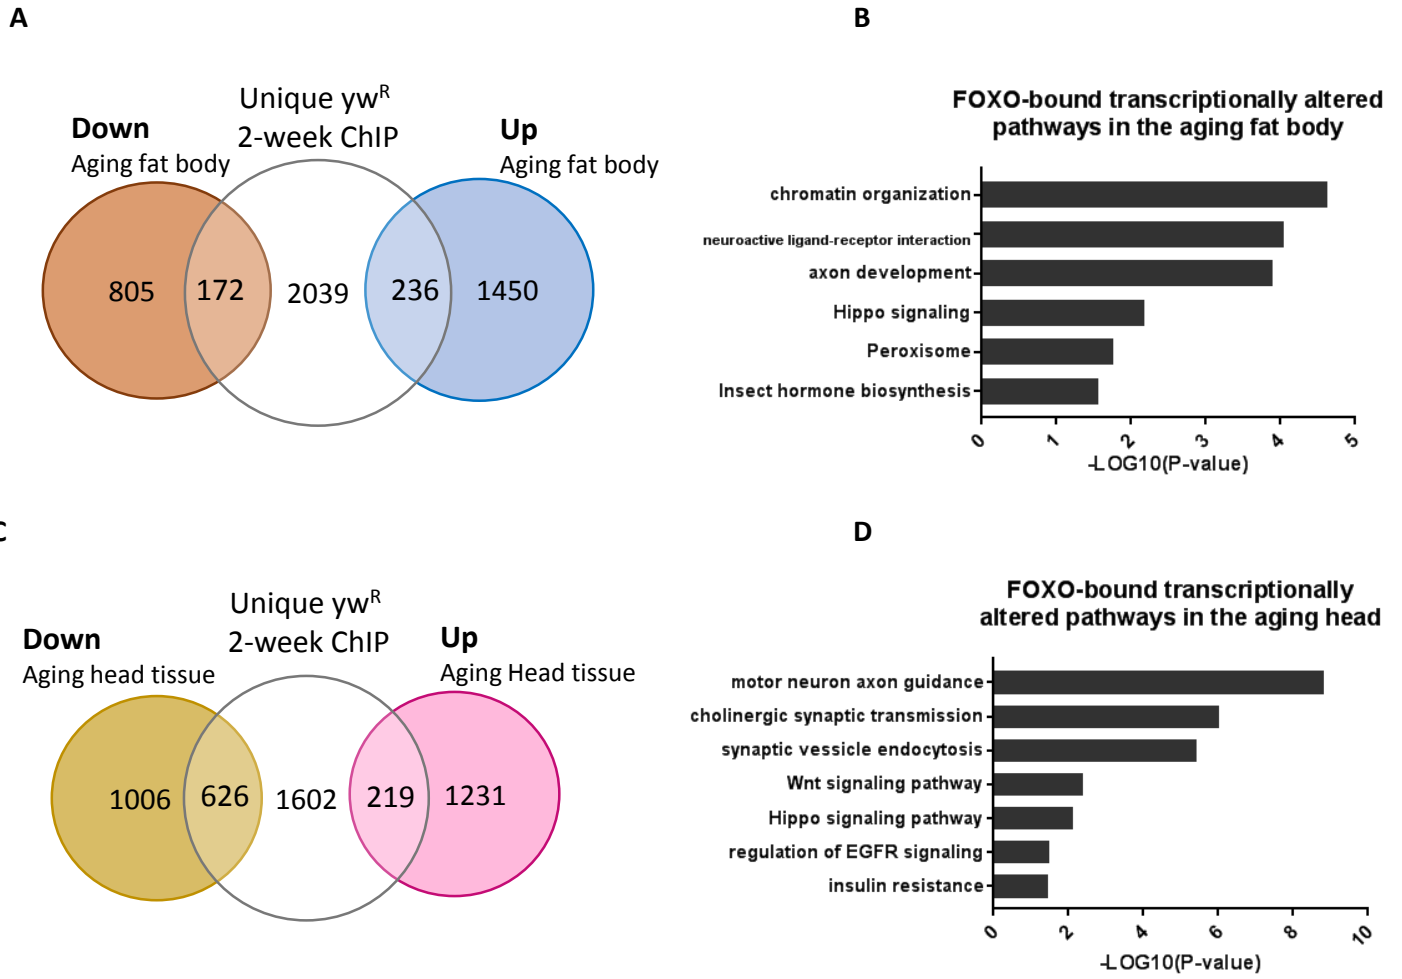

# Figure 4

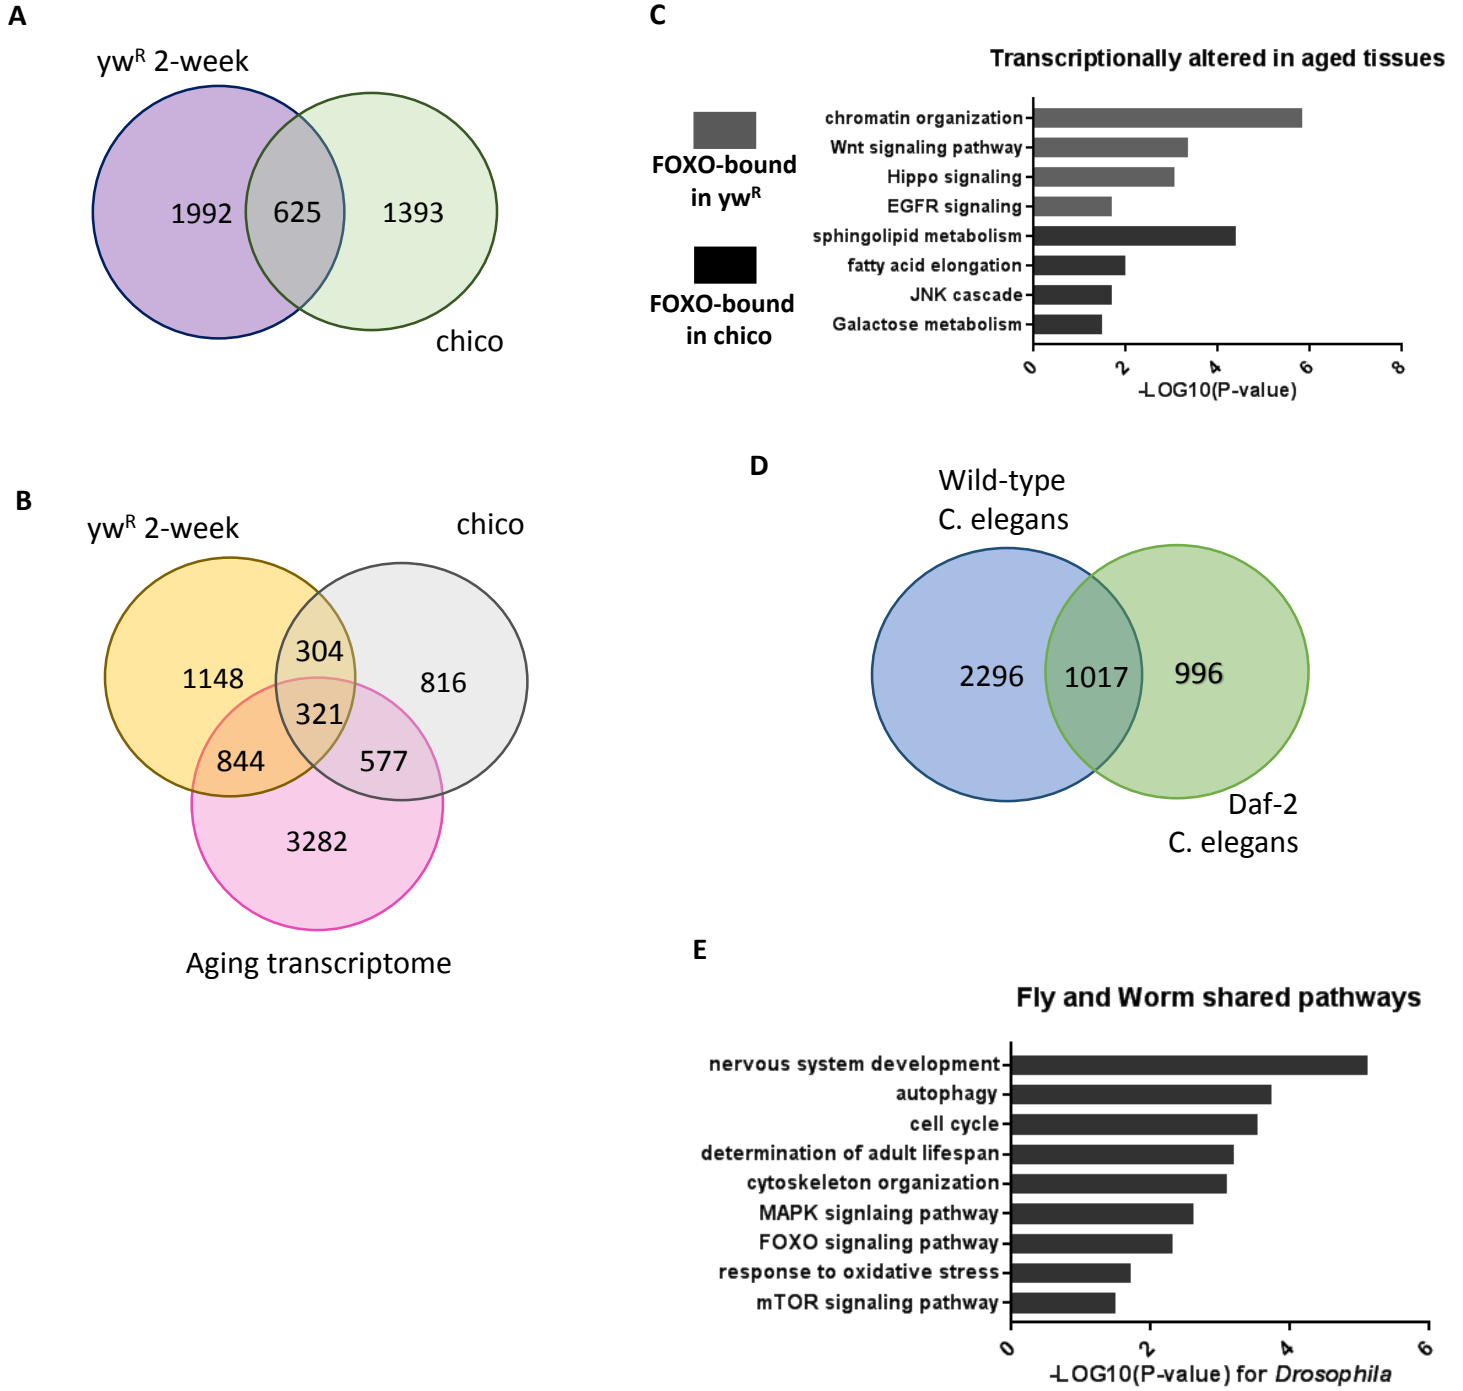

# Table 1

| motif                                                                              | P-value   | # targets with motif | predicted to be bound by                             |
|------------------------------------------------------------------------------------|-----------|----------------------|------------------------------------------------------|
| Enriched known binding motifs compared to whole genome                             |           |                      |                                                      |
|   | 1.00E-70  | 842                  | Trl(Zf)/S2-GAGAFactor                                |
| Enriched <i>de novo</i> binding motifs compared to whole genome                    |           |                      |                                                      |
|   | 1.00E-164 | 47.58%               | RAP1/MA0359.1/Jaspar(0.703)                          |
|   | 1.00E-130 | 44.94%               | hb/dmmpmm(Noyes)/fly(0.726)                          |
|   | 1.00E-82  | 35.48%               | Adf1/dmmpmm(Bergman)/fly(0.664)                      |
|   | 1.00E-56  | 27.59%               | Aef1/dmmpmm(Pollard)/fly(0.851)                      |
| Enriched known binding motifs all organisms                                        |           |                      |                                                      |
|  | 1.00E-04  | 1012                 | Foxo1(Forkhead)/RAW-Foxo1-ChIP-Seq(Fan_et_al.)/Homer |
|                                                                                    |           |                      |                                                      |
|                                                                                    |           |                      |                                                      |

# Figure S1

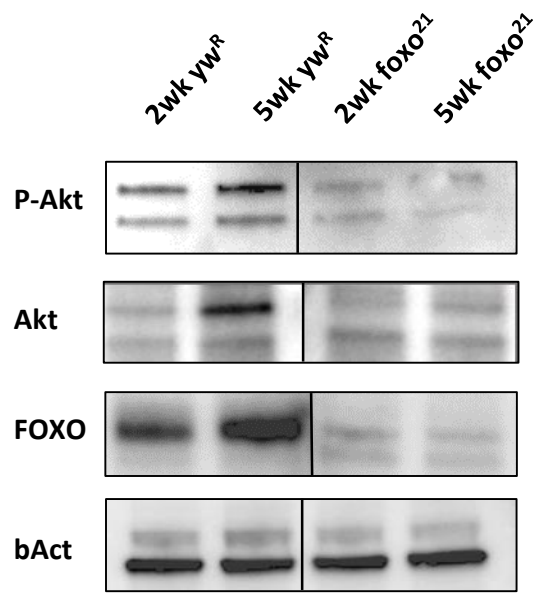

## Figure S2

| Sample                 | Concentration |
|------------------------|---------------|
| ywR 2-week old ChIP-1  | 7.49 ng/ul    |
| ywR 2-week old input-1 | 35.9 ng/ul    |
| ywR 2-week old ChIP-2  | 6.41 ng/ul    |
| ywR 2-week old input-2 | 26.6 ng/ul    |
| ywR 5-week old ChIP-1  | 20.2 ng/ul    |
| ywR 5-week old input-1 | 32.1 ng/ul    |
| ywR 5-week old ChIP-2  | 8.79 ng/ul    |
| ywR 5-week old input-2 | 26.7 ng/ul    |

## Figure S3

| Sample                 | Raw reads | % Alignment |
|------------------------|-----------|-------------|
| ywR 2-week old ChIP-1  | 25554421  | 85.74%      |
| ywR 2-week old input-1 | 40459444  | 96.09%      |
| ywR 2-week old ChIP-2  | 15933943  | 73.70%      |
| ywR 2-week old input-2 | 34196540  | 96.26%      |
| ywR 5-week old ChIP-1  | 15880701  | 92.00%      |
| ywR 5-week old input-1 | 73535040  | 95.06%      |
| ywR 5-week old ChIP-2  | 14515822  | 91.76%      |
| ywR 5-week old input-2 | 40815124  | 95.98%      |

Figure S4

## Hippo Signaling Pathway

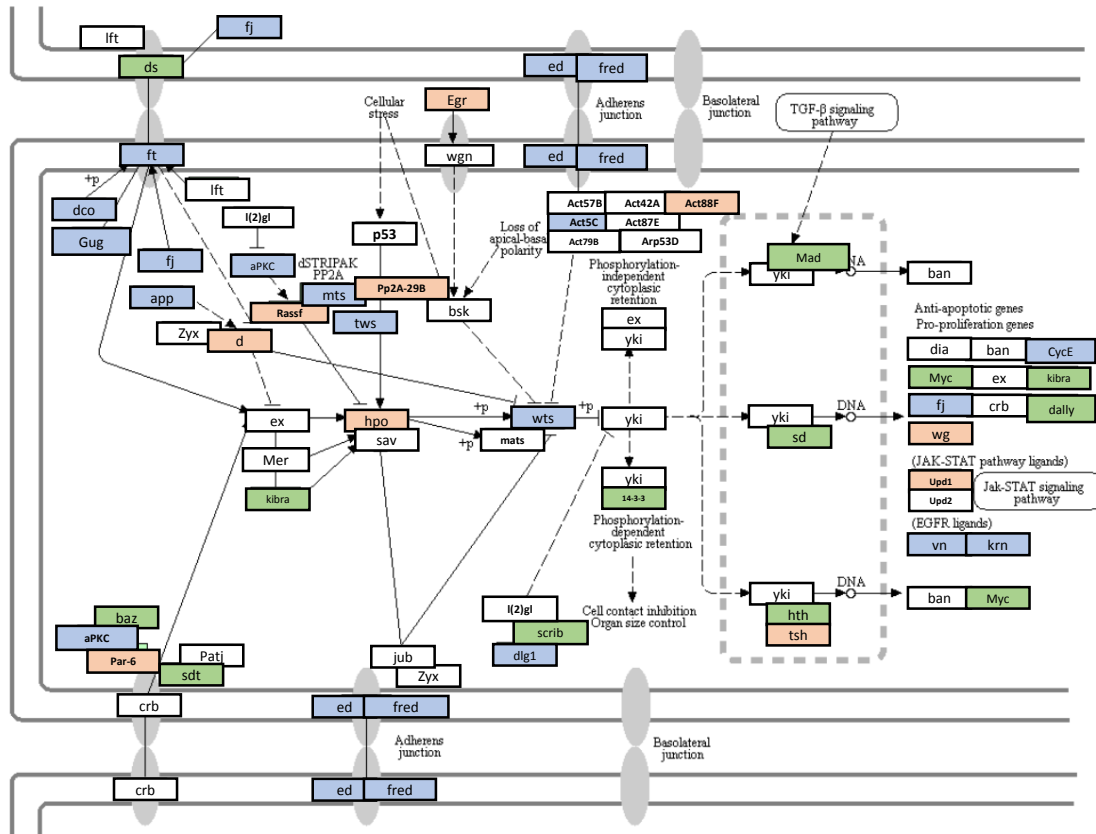

# Figure S5

## EGFR Pathway

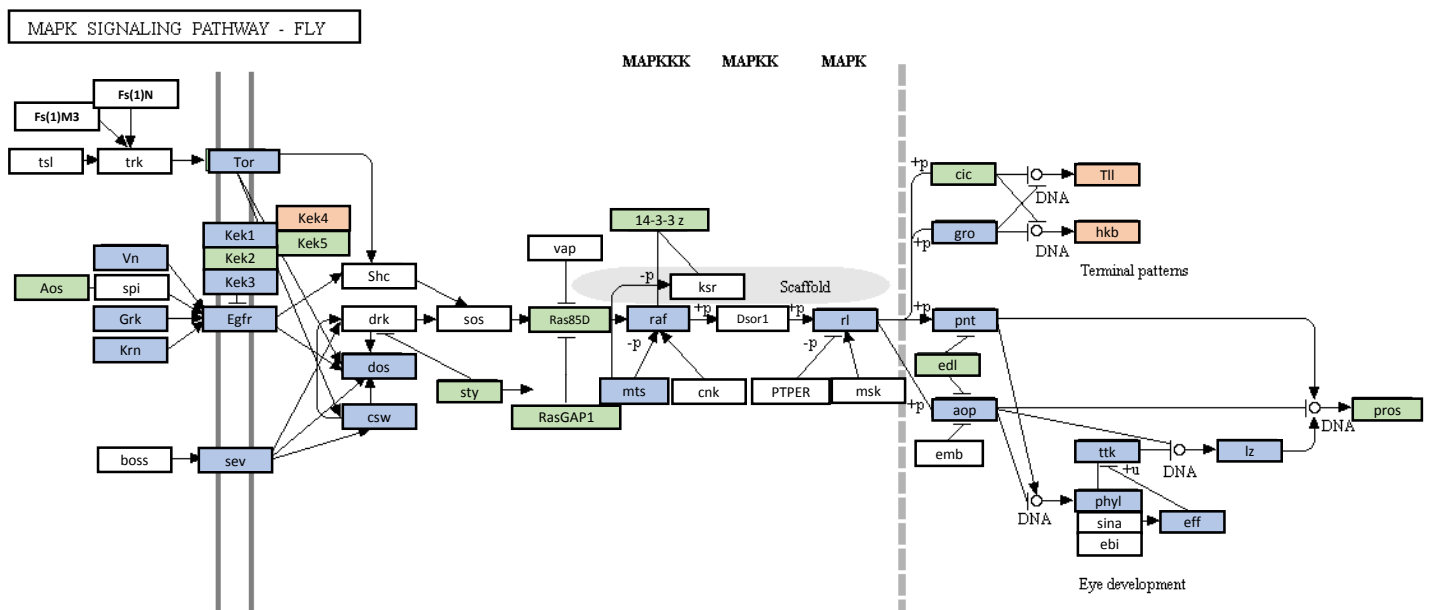



# Figure S6

## JNK Pathway

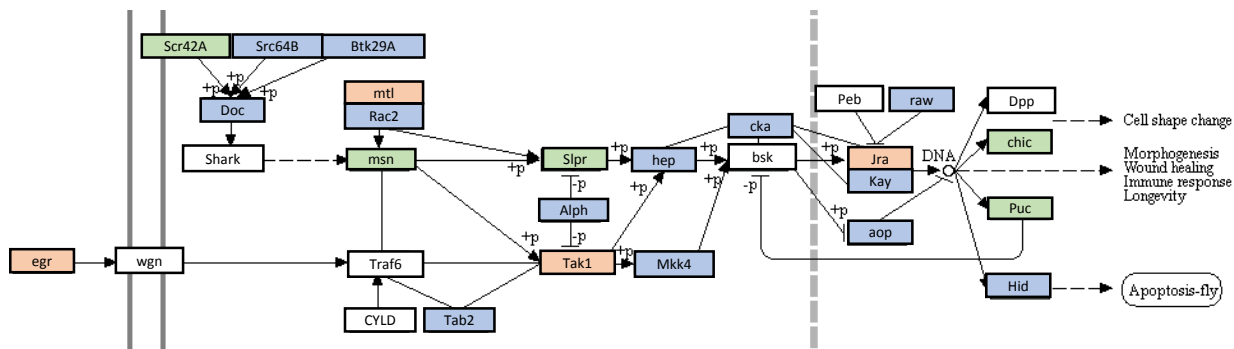

## Figure S7

| <b>Gene</b> | <b>Direction</b> | <b>Sequence 5'-&gt;3'</b> |
|-------------|------------------|---------------------------|
| Act5C       | Forward          | TCGCGATTTGACCGACTACCTGAT  |
|             | Reverse          | TGATGTCACGGACGATTTACGCT   |
| InR-prom974 | Forward          | ATAGAACGACGCACTTTCCC      |
|             | Reverse          | CGCGCGCTCTCCTATTATTTA     |
| Bmm-prom1   | Forward          | CACCGCGCCGCAATGAATGTATAA  |
|             | Reverse          | TTCAATCACTGTTTGTCGGTCGGC  |
| Jim         | Forward          | GAGGCGGGTTTAAGGCTATT      |
|             | Reverse          | CAGGCAAACAAATCAAAGCAAAC   |
